# Supplementary material
Source: Springer Nature journal article supplement (https://www.springermedizin.de/resource/supplementary/12936_2009_945_MOESM11_ESM.pdf/9548594)

Figure 5

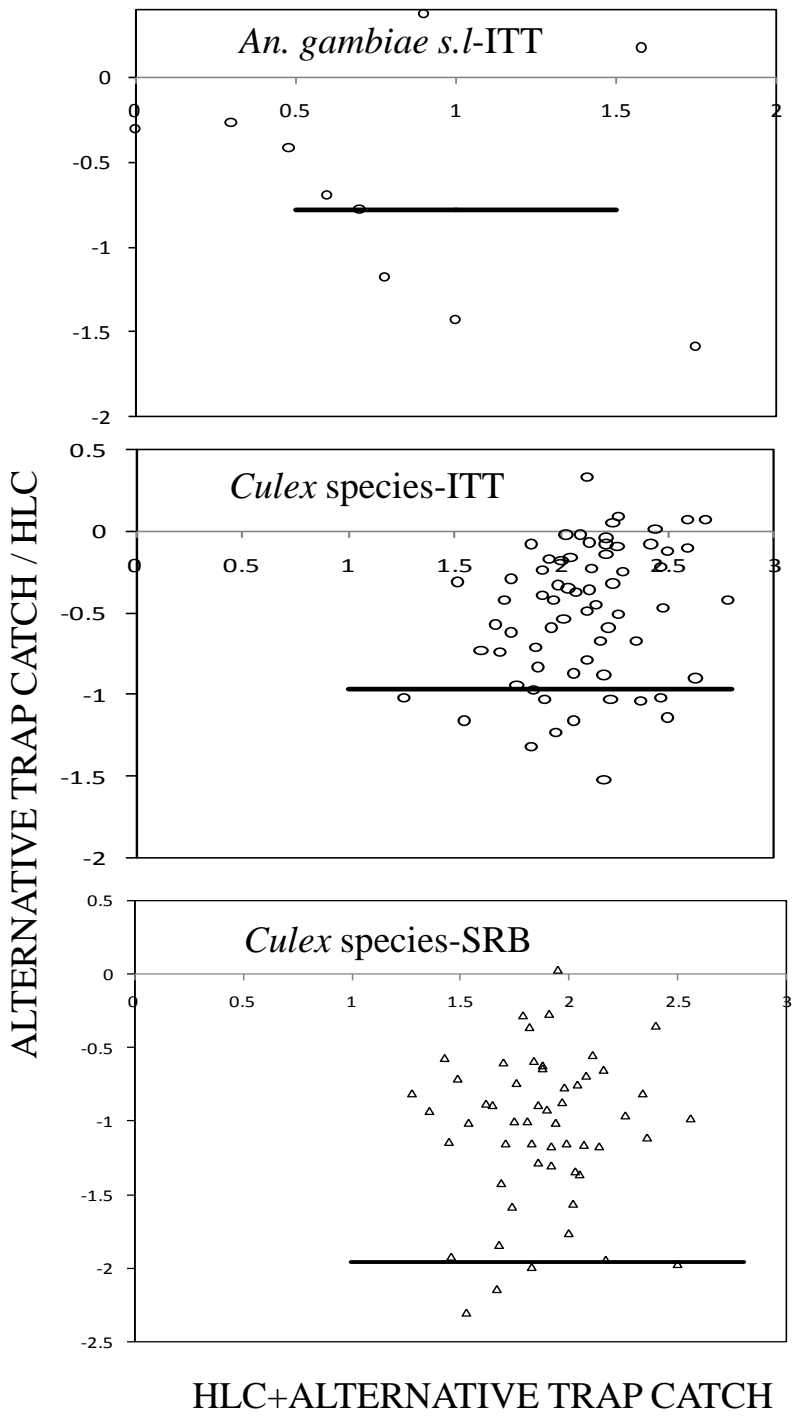

Supplement: MOESM11 [file 9548594]
